# Supplementary material for: Interpersonal Variations in Gut Microbiota Profiles Supersedes the Effects of Differing Fecal Storage Conditions
Source: PubMed Central journal article supplement (PMC6255890; doi:10.1038/s41598-018-35843-0), 2018-11-26

## **Interpersonal Variations in Gut Microbiota Profiles Supersedes the Effects of Differing Fecal Storage Conditions.**

Caspar Bundgaard-Nielsen, Søren Hagstrøm, Suzette Sørensen

### **Supplementary images**

**Title:** Interpersonal Variations in Gut Microbiota Profiles Supersedes the Effects of Differing Fecal Storage Conditions.

**Authors:**

Caspar Bundgaard-Nielsen<sup>1,2</sup>, Søren Hagstrøm<sup>1,2,3</sup>, Suzette Sørensen<sup>1,2</sup> \*

**Affiliations:**

<sup>1</sup> Centre for Clinical Research, North Denmark Regional Hospital, Hjørring, Denmark

<sup>2</sup> Department of Clinical Medicine, Aalborg University, Aalborg, Denmark.

<sup>3</sup> Department of Pediatrics, Aalborg University Hospital, Aalborg, Denmark

\* Corresponding author: [Suzette.soerensen@rn.dk](mailto:Suzette.soerensen@rn.dk)

### 1.1 Rarefaction curve

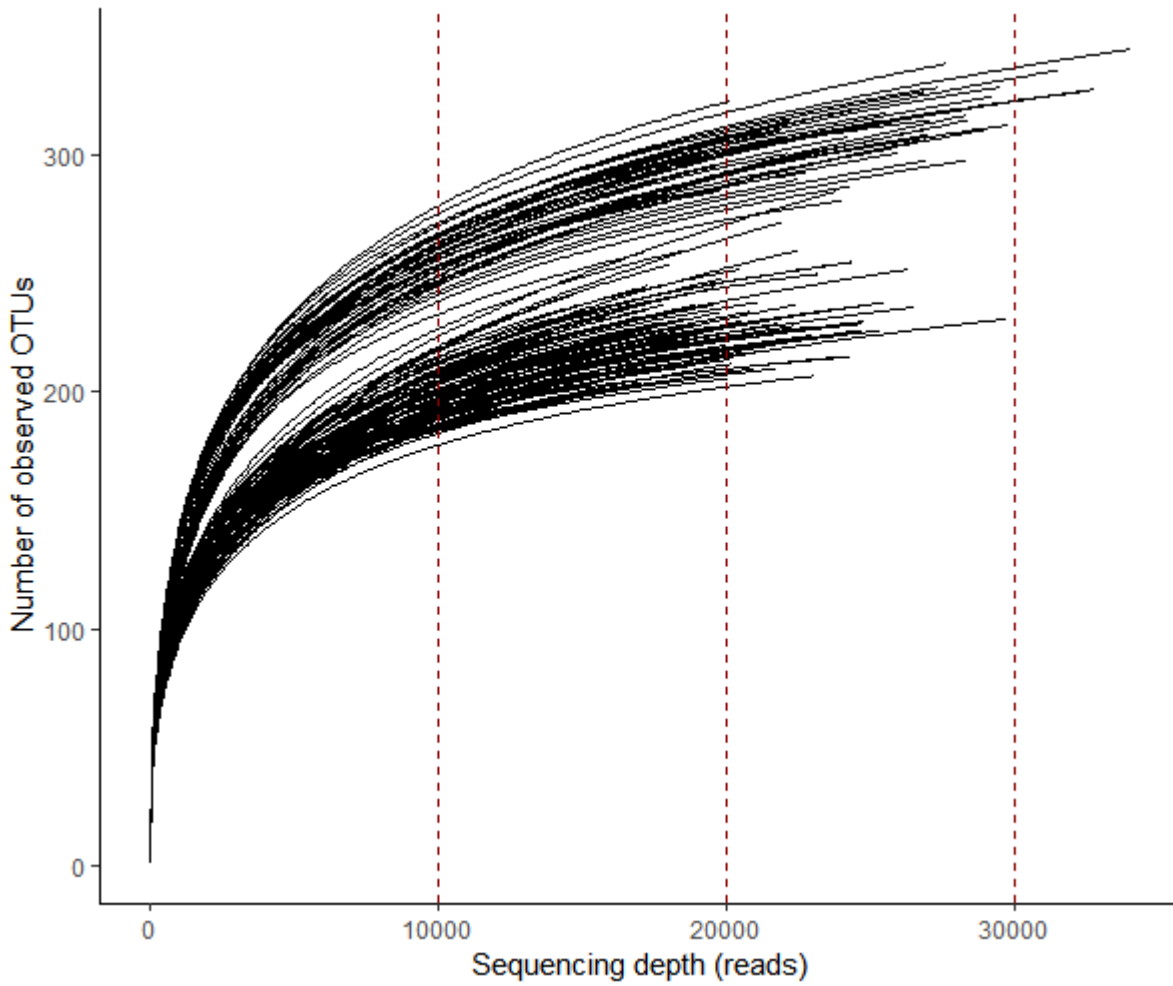

Generated in R through the Rstudio IDE, in ampvis2 package v.2.3.11. Note generation of new OTUs had started to plateau following end of sequencing. More than 10.000 reads were obtained in all samples.

# Interpersonal Variations in Gut Microbiota Profiles Supersedes the Effects of Differing Fecal Storage Conditions.

Caspar Bundgaard-Nielsen, Søren Hagstrøm, Suzette Sørensen

## 1.2 A comparison of triplicates and individual samples

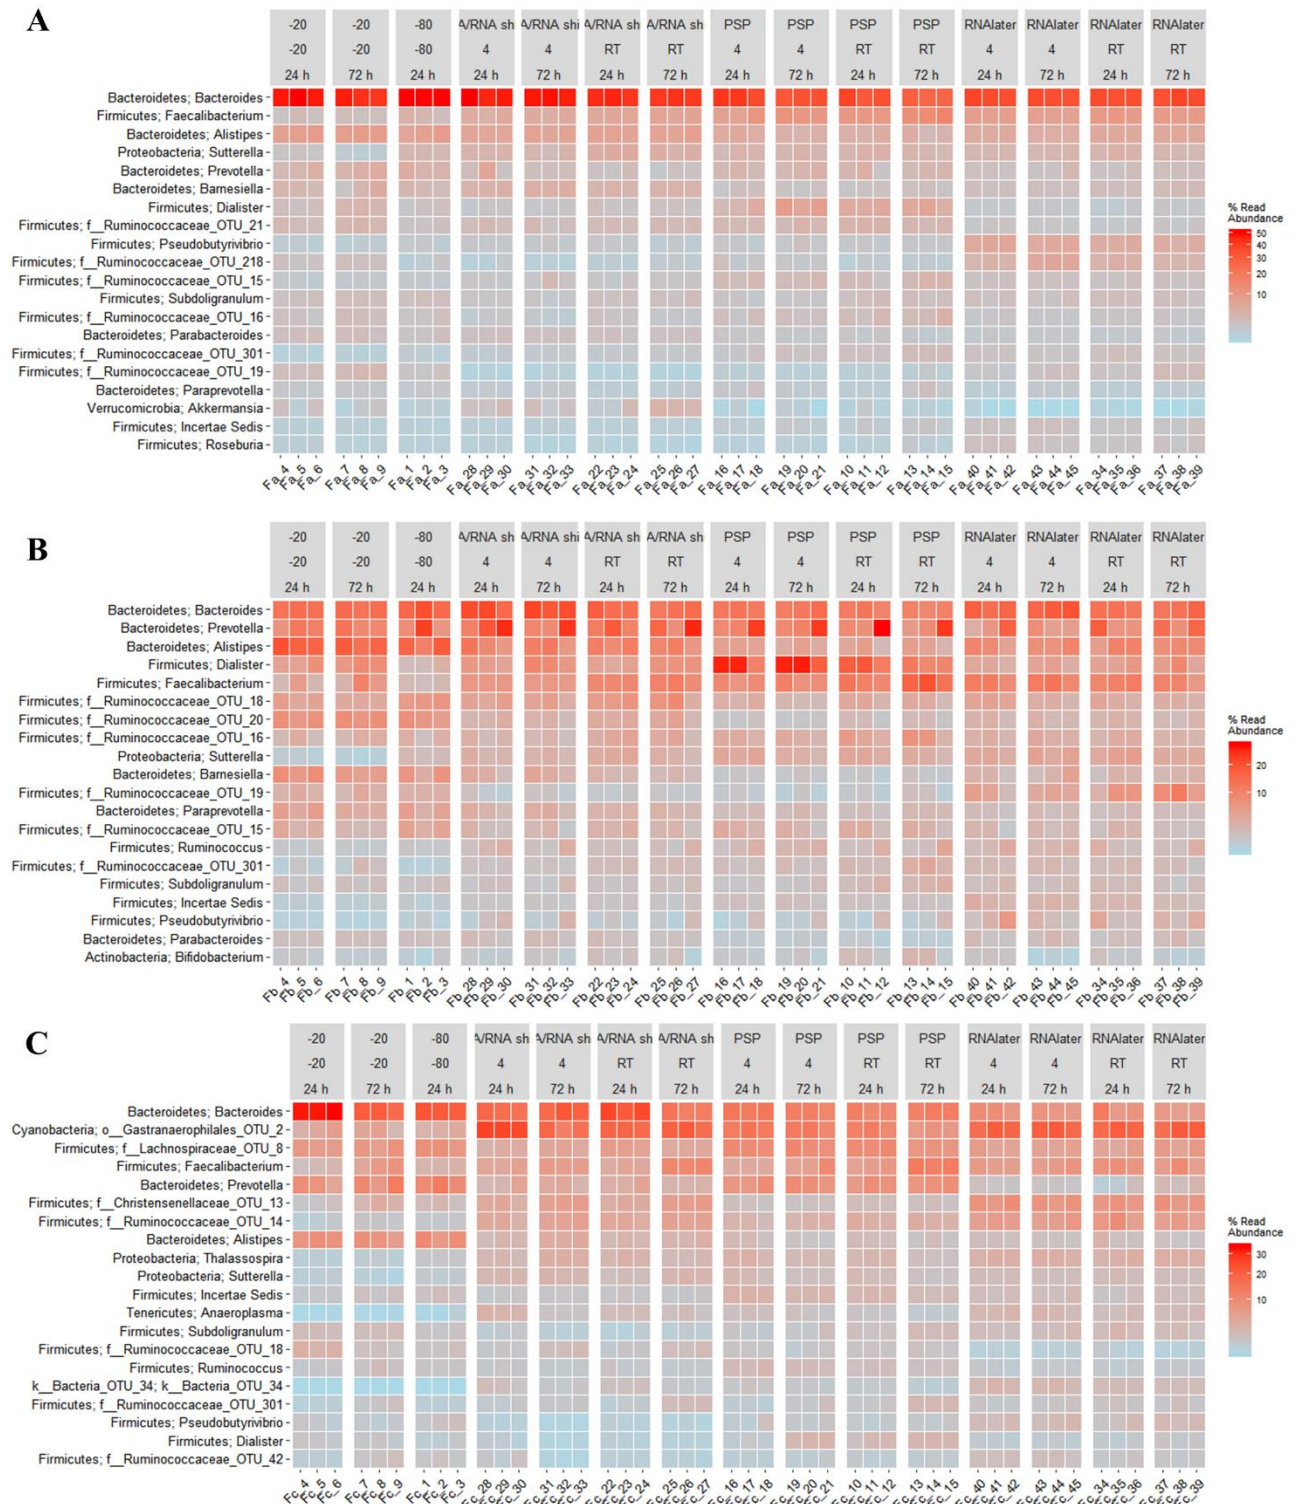

For each donor, the heatmap is faceted by each setup, with the bacterial composition of each of the three triplicates being compared side-by-side. All triplicates are highly similar.

**Interpersonal Variations in Gut Microbiota Profiles Supersedes the Effects of Differing Fecal Storage Conditions.**

Caspar Bundgaard-Nielsen, Søren Hagstrøm, Suzette Sørensen

**1.3 Gel electrophoresis**

DNA integrity of all fecal samples, following DNA extraction, were evaluated using agarose gel electrophoresis. The following characteristics for the electrophoresis were used:

- 1 % agarose gel in TBE buffer
- 1:10,000 concentration of Gelred Nucleic Acid Gel stain (Biotium)
- 100 V for 3 hours and 40 minutes
- GeneRule 1kb plus DNA Ladder (Thermo Scientific, see the image to the right).

GeneRuler 1 kb Plus DNA Ladder, ready-to-use

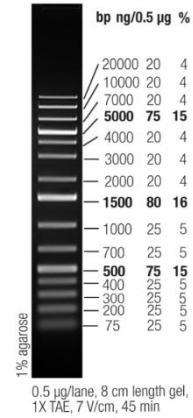

For each replicate, for each separate donor, the following setup was used for load the gel:

| 1      | 2      | 3            | 4            | 5             | 6             | 7               | 8               | 9                        | 10                       | 11                         | 12                         | 13                  | 14                  | 15                    | 16                    |
|--------|--------|--------------|--------------|---------------|---------------|-----------------|-----------------|--------------------------|--------------------------|----------------------------|----------------------------|---------------------|---------------------|-----------------------|-----------------------|
| Ladder | -80 °C | -20 °C - 24h | -20 °C - 72h | PSP, RT - 24h | PSP, RT - 72h | PSP, 4 °C - 24h | PSP, 4 °C - 72h | DNA/RNA shield, RT - 24h | DNA/RNA shield, RT - 72h | DNA/RNA shield, 4 °C - 24h | DNA/RNA shield, 4 °C - 72h | RNA-later, RT - 24h | RNA-later, RT - 72h | RNA-later, 4 °C - 24h | RNA-later, 4 °C - 72h |

Following electrophoresis, the gels were visualized using a SynGene G-boks with automatic exposure. A subsequent manual overexposure of 3 seconds was used, to improve visualizing DNA integrity.

The resulting gels can be seen on the next three pages.

## Donor A

Normal exposure

3 sec. overexposure

Triplicates

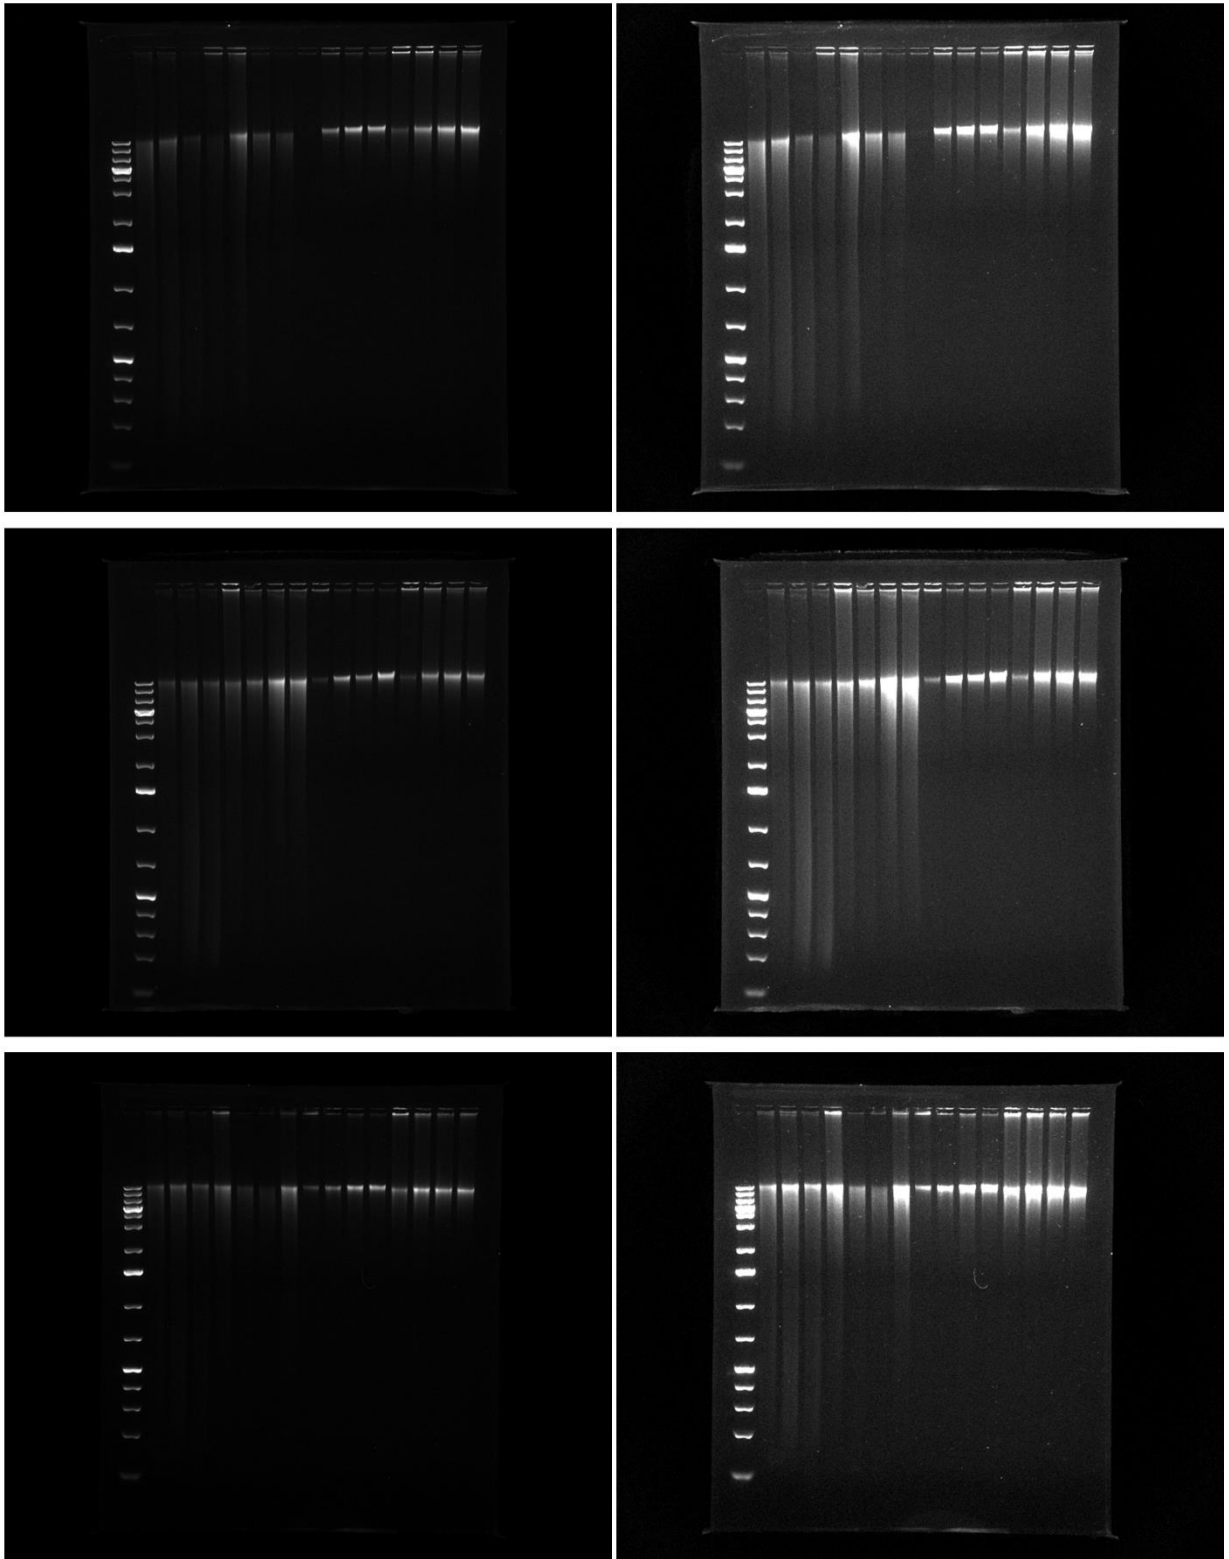

## Donor B

Normal exposure

3 sec. overexposure

Triplicates

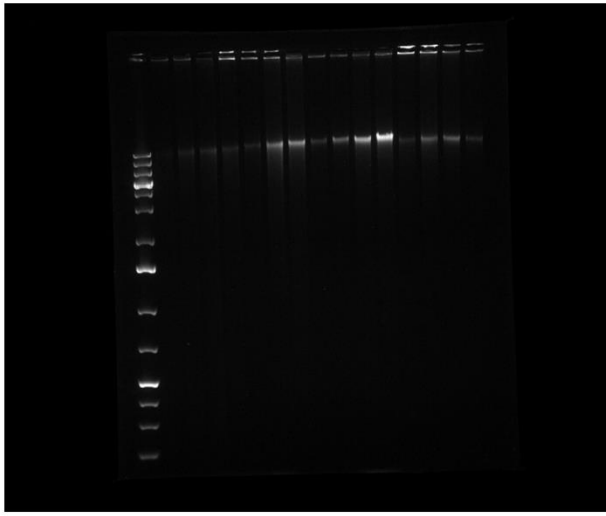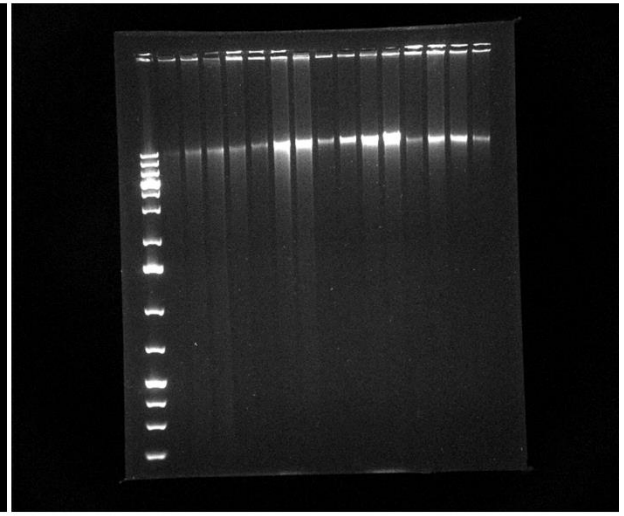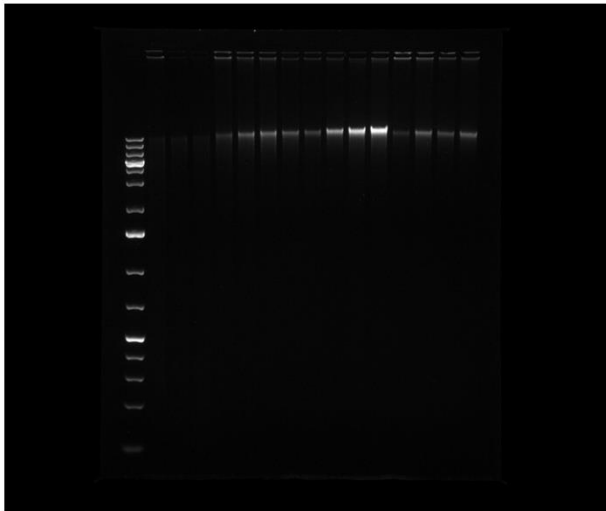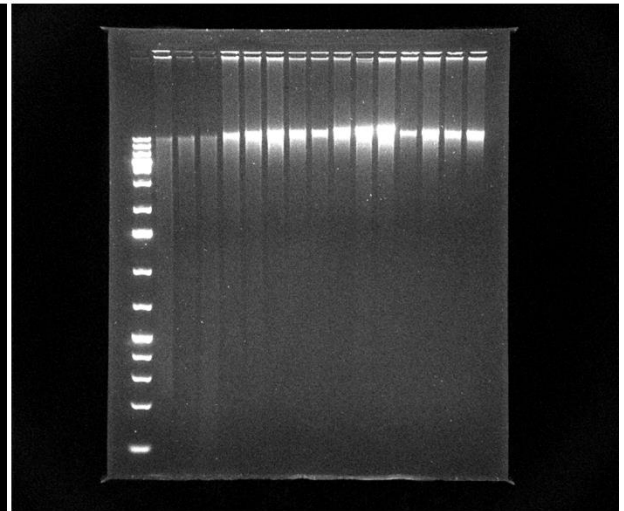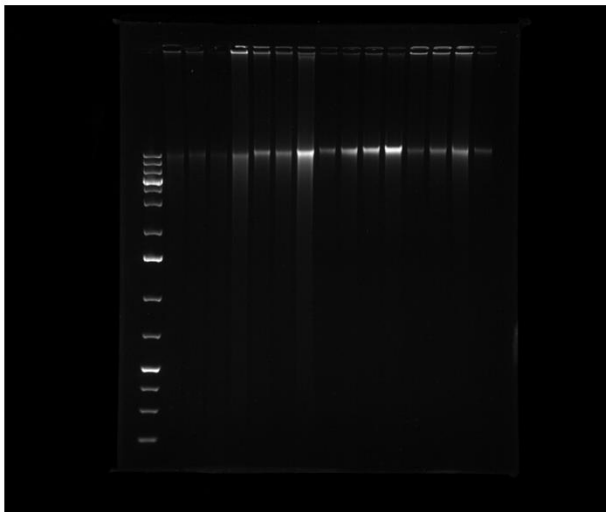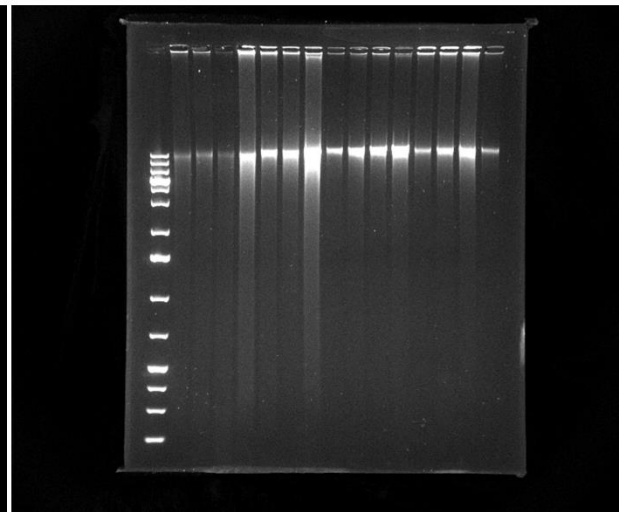



**Donor C**

**Normal exposure**

**3 sec. overexposure**

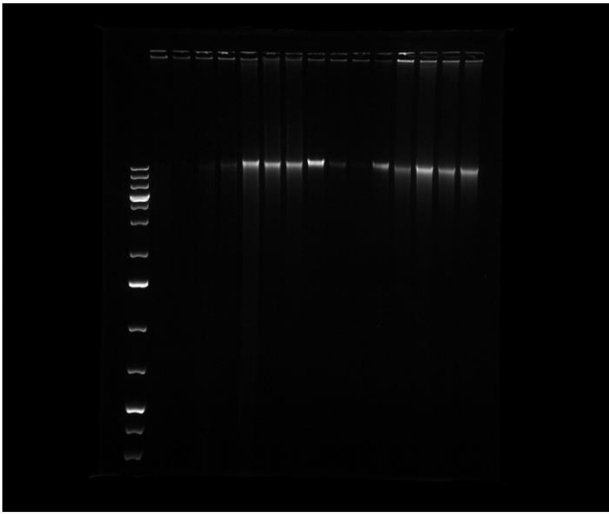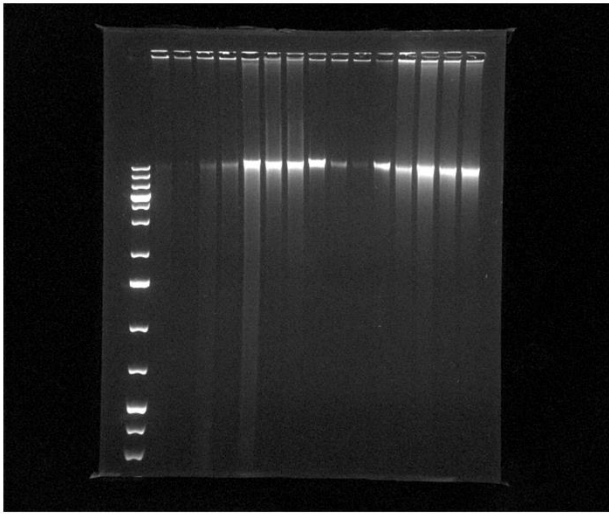

Triplicates

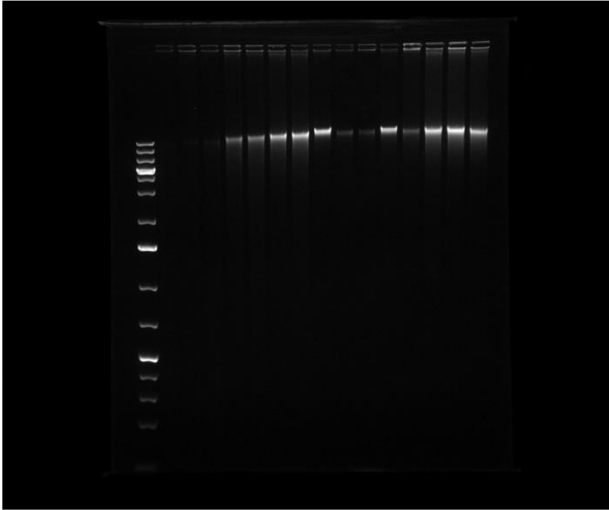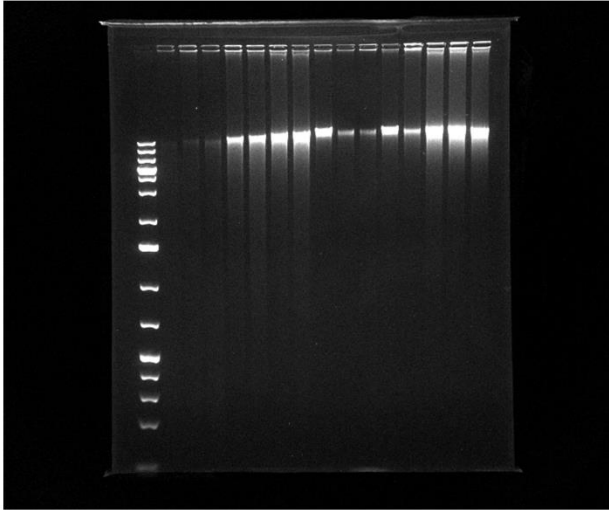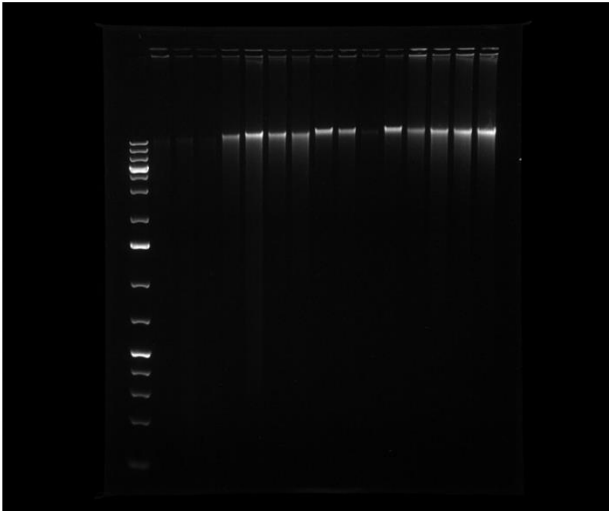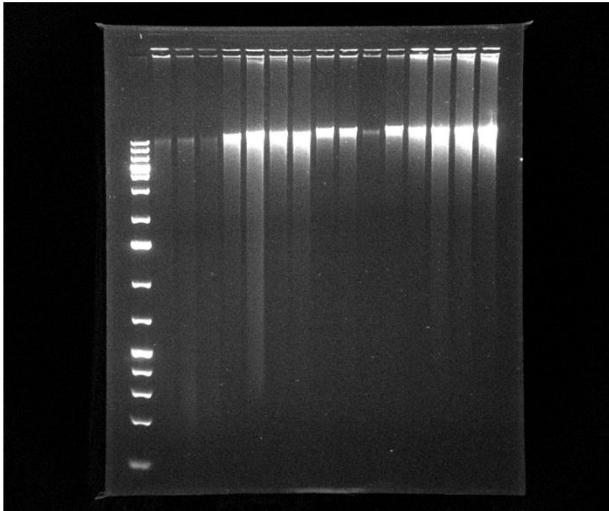

Supplement: 41598_2018_35843_MOESM1_ESM.pdf [file 41598_2018_35843_MOESM1_ESM.pdf]
